# Supplementary material
Source: publisher figshare collection journal article supplement (https://tandf.figshare.com/ndownloader/files/12994979)
Supplement: Supplementary file 1 [file 12994979]

**Supplementary file**

Title: **Copper(I) selenophene-2-carboxylate (CuSC) promoted C-S cross-coupling reaction of thiols with aryl iodides**

Olga Soares do Rêgo Barros,a* Francielle Rodrigues Silva a and Vanessa Loren Nunesa

Laboratório de Síntese Molecular, Instituto de Química, Universidade Federal de Goiás, Campus Samambaia, CEP 74001-970 - Goiânia – Goiás – Brazil- Fax:+55-62-3521-1167

[olga_barros@quimica.ufg.br](mailto:olga_barros@quimica.ufg.br)

**Materials**

**All reagents and solvents used were previously purified and dried in agreement with the literature [10].** THF was distilled from sodium/benzophenone under nitrogen immediately before use. Butyllithium was titrated using 1,10-phenanthroline as indicator prior to use. Nitrogen gas used in the reactions was deoxygenated and dried. All operations were carried out in flame-dried glassware. Column chromatography separations were performed with Aldrich Chemical Co. silica gel 60 (0.063–0.200 mm, 70–230 mesh) or silica gel (0.035–0.075 mm, pore diameter ca. 6 nm). The chemicals were obtained from commercial sources.

**Analysis**

All new compounds have been characterized by 1H and 13C NMR, IR spectroscopy and elemental analysis. 1H and 13C NMR spectra were obtained on a Bruker Avance III 500 (500 MHz, 1H; 125 MHz, 13C) Spectrometer. All spectra were taken in CDCl3 and the chemical shifts are given in ppm with respect to tetramethylsilane (TMS) used as internal standard. Near IR spectra were obtained on a Perkin Elmer Precisely Spectrum 400 FT-IR/FT-FIR Spectrometer. Elemental analyses were performed on a Thermo scientific Flash 2000 Organic Elemental Analyzer. The IUPAC names were obtained using the software ChemDraw, version 8.0.

**(1) Procedure for the preparation of Copper(I)-Selenophene-2-carboxylate**

In a similar procedure to preparation copper(I) thiophene-2-carboxylate (CuTC)[8] A Schlenk tube was charged with selenophene-2-carboxylic acid (0.94g, 5.5 mmol), Cu2O (0.19 g, 1.3 mmol) and toluene (5 mL), the mixture was stirring at reflux for 12 h under dry Argon to affording a brown suspension that was cooled at ambient temperature and the product was collected on a fritted-glass funnel under a steam of argon. After this, the solid was washed with methanol, to remove excess of acid, and then with ether until the eluent was colorless, and finally with hexanes. The solid was dried under vacuum affording the copper(I)-selenophene-2-carboxylate. The product was obtained as a tan, air stable powder (0.210 g 72%). IR (KBr): 3057, 1564, 1433, 1383 cm-1. Anal. Calc. For C5H3O2CuSe: C: 25.28, H: 1.27. Found: C: 24.5, H: 1.3.

**(2) General procedure for the preparation of aryl sulfides 3**

In a Schlenk tube a mixture of **I** (6 mg, 0.025mmol), iodobenzene (101 mg, 0.5 mmol), 4-methylbenzenethiol (75 mg, 0.6mmol) and K3PO4 (422 mg, 2.0 mmol) was suspended in DMSO (3 mL) and stirred at 1100C under anargon atmosphere for 24 h. After this, the reaction mixture was filtrated with DCM (10 mL), quenched with 5 mL of a (NH4Cl) solution and extracted with EtOAc (3 x 10 mL). The organic layer was dried with (Na2SO4). The solvent was evaporated under reduced pressure, and the crude mixture was purified by silica gel column chromatography eluting with hexane.

**(3) SPECTROSCOPIC DATA OF SELECTED COMPOUNDS**

**Phenyl(*p*-tolyl)sulfane** (**3a**) [1]: clear oil. 1H NMR: CDCl3 500MHz δ(ppm): 7.30-7.28 (m, 2H), 7.27-7.23 (m, 4H), 7.20-7.16 (m, 1H), 7.13-7.12 (m, 2H), 2.32 (s, 3H). 13CNMR (125 MHz, CDCl3): 137.83, 137.33, 132.52, 131.40, 130.30, 129.92, 129.27, 126.60, 21.34. IR(KBr): 3050, 1520, 1434, 725. Anal. Calc.For C13H12S: C: 77.95, H: 6.04, S: 16.01. Found: C: 76.45, H: 5.88.

**Phenyl(o-tolyl)sulfane** (**3b**) [1]: clear oil. 1H NMR: CDCl3 500MHz δ(ppm): 7.30-7.28 (m, 1H); 7.24-7.15 (m, 7H); 7.13-7.10 (m, 1 H); 2.36 (s, 3H). 13CNMR (125 MHz, CDCl3): 140.16, 136.39, 133.96, 133.21, 130.78, 129.80, 129.30, 128.09, 126.89, 126.89, 20.82. IR(KBr): 3059, 1583, 1477, 1025, 740. Anal. Calc.For C13H12S: C: 77.95, H: 6.04, S: 16[[1]](#endnote-1).01. Found: C, 76.31, H, 5.70.

**Diphenylsulfane (3c) [9]: clear oil. 1H NMR: CDCl3 400 MHz: δ (ppm): 7.57 (s, 1H), 7.42 (t, *J* = 5.8Hz, 3H), 7.39–7.33 (m, 4H), 7.33–7.24 (m, 2H). 13C NMR(101MHz, CDCl3): 137.10, 135.86, 131.10, 129.25, 129.13, 127.57, 127.21, 127.10.**

**(4-Chlorophenyl)(phenyl)sulfane** (**3d**) [2]: Yellowish oil.1H NMR: CDCl3 500MHz δ(ppm): 7.36-7.30 (m, 5H); 7.28-7.25 (m, 4H).13CNMR (125 MHz, CDCl3): 135.12, 134.65, 132.98, 132.00, 131.31, 129.28, 127.40. IR(KBr): 3060, 1583, 1475,1087, 739. Anal. Calc.For C12H9ClS: C, 65.30; H, 4.11; S, 14.53. Found: C: 65.35, H: 4.08.

**(4-Methoxyphenyl)(phenyl)sulfane** (**3e**) [1]: clear oil. 1H NMR: CDCl3 500MHz δ(ppm): 7.41-7.38 (m, 2H), 7.22-7.09 (m, 5H), 6.88-6.86 (m, 2H), 3.78 (s, 3H). 13CNMR (125 MHz, CDCl3): 159.79, 138.53, 135.23, 128.86, 128.23, 125.71, 124.36, 114.95, 55.27. IR(KBr): 3003, 2835, 1494,1479, 1246, 828, 740. Anal. Calc.For C13H12OS: C, 72.19; H, 5.59. Found: C, 72.45, H, 5.68.

**(2-(Phenylthio)pyridine** (**3f**) [3]: clear oil. 1H NMR: CDCl3 500MHz δ(ppm): δ 8.45 (d, *J* = 4.4 Hz, 1H), 7.66 – 7.60 (m, 2H), 7.51 – 7.41 (m, 4H), 7.01 (ddd, *J* = 7.3, 4.9, 0.8 Hz, 1H), 6.93 (d, *J* = 8.1 Hz, 1H). 13CNMR (125 MHz, CDCl3): 125.24, 121.61, 130.25, 135.30, 136.29, 136.95, 146.93, 160.42.. IR(KBr): 3047, 2850, 1635, 1448, 1417, 1121, 985, 751.

**(2-(Phenylthio)benzenamine** (**3g**) [4]: yellow oil. 1H NMR: CDCl3 500MHz δ(ppm):δ 7.46-7.48 (m, 1H), 7,23-7.26 (m, 3 H), 7.11-7.13 (m, 3H), 6.77-6.80 (m, 2H), 4,29 (s, 2H).13CNMR (125 MHz, CDCl3): 152.14, 137.43, 135.95, 130.24, 128.27, 126.45, 123.76, 118.13, 113.54, 110.46. IR(KBr): 3473, 3370, 3061, 1609, 1583, 1478, 1447, 1308, 740, 690

**(Isobutyl(phenyl)sulfane** (**3h**) [5]: clear oil 1H NMR: CDCl3 500MHz δ(ppm): 7.32-7.30 (m, 2H), 7.26-7.23 (m, 2H), 7.15-7.11 (m, 1H), 2.79 (d, *J* = 6.6 Hz, 2H), 1.86-1.94 (m, 1H), 1.01 (d, *J* = 6.6 Hz, 6H).13CNMR (125 MHz, CDCl3): 137.41, 128.81, 128.73, 125.50, 42.58, 28.23, 21.99. IR(KBr): 3060, 2958, 1585, 1480, 737. Anal. Calc.For C10H14S: C, 72.23; H, 8.49; S, 19.28. Found: C,70.8; H, 7.11.

**Cyclohexyl(phenyl)sulfane** (**3i**) [1]: clear oil. 1H NMR: CDCl3 500MHz δ(ppm):7.39-7.37 (m, 2H); 7.27-7.23 (m, 2H); 7.20-7.17 (m, 1H); 3.11-3.06 (m, 1H); 1.98-1.95 (m, 2H); 1.78-1.73 (m, 2H); 1.61-1.57 (m, 1H); 1.39-1.19 (m, 5H). 13CNMR (125 MHz, CDCl3): 135.20; 131.84; 128.67; 126.51; 46.55; 33.33; 26.03; 25.68. IR(KBr): 2929, 1584, 1448,996. Anal. Calc.For C12H16S: C, 74.94; H, 8.39. Found: C, 75.80; H, 8.41.

***o*-Tolyl(p-tolyl)sulfane** (**3j**) [6]: clear oil. 1H NMR: CDCl3 500MHz δ(ppm): 7.20-7.11 (m, 5H), 7.09-7.05 (m, 3H), 2.36 (s, 3H), 2.30 (s, 3H). 13CNMR (125 MHz, CDCl3): 138.78, 136.78, 135.17, 131.72, 131.44, 130.96, 130.37, 129.96, 127.09, 126.53, 21.00, 20.42. IR(KBr): 3060, 1589, 1492, 805, 746. Anal. Calc.For: C14H14S: C, 78.46; H, 6.58. Found: C, 74.73, H, 6.28.

colorless liquid in 96 % yield. CAS: 4279-70-3.

1

H NMR

(400 MHz, CDCl

3

): δ = 7.20–7.06 (m, 8 H, Ar-H), 2.37 (s, 3 H,

CH

3

), 2.31 (s, 3 H, CH

3

) ppm.

13

C NMR (100 MHz, CDCl

3

): δ =

139.0, 137.0, 135.4, 131.9, 131.7, 131.2, 130.6, 130.2, 127.3, 126.7,

21.2, 20.6 ppm. GC–MS (EI): m/z = 214 [M]

+

colorless liquid in 96 % yield. CAS: 4279-70-3.

1

H NMR

(400 MHz, CDCl

3

): δ = 7.20–7.06 (m, 8 H, Ar-H), 2.37 (s, 3 H,

CH

3

), 2.31 (s, 3 H, CH

3

) ppm.

13

C NMR (100 MHz, CDCl

3

): δ =

139.0, 137.0, 135.4, 131.9, 131.7, 131.2, 130.6, 130.2, 127.3, 126.7,

21.2, 20.6 ppm. GC–MS (EI): m/z = 214 [M]

+

colorless liquid in 96 % yield. CAS: 4279-70-3.

1

H NMR

(400 MHz, CDCl

3

): δ = 7.20–7.06 (m, 8 H, Ar-H), 2.37 (s, 3 H,

CH

3

), 2.31 (s, 3 H, CH

3

) ppm.

13

C NMR (100 MHz, CDCl

3

): δ =

139.0, 137.0, 135.4, 131.9, 131.7, 131.2, 130.6, 130.2, 127.3, 126.7,

21.2, 20.6 ppm. GC–MS (EI): m/z = 214 [M]

+

.

(**4-Bromophenyl)(o-tolyl)sulfane** (**3k**) [7]: lightly yellow liquid. 1H NMR: CDCl3 500MHz δ(ppm): 7.36-7.31 (m, 3H), 7.25-7.20 (m, 2H), 7.16-7.13 (m, 1H), 7.01-7.00 (m, 2H), 2.35 (s, 3H). 13CNMR (125 MHz, CDCl3): 140.43, 135.89, 133.64, 132.09, 130.77, 130.55, 128.46, 126.85, 119.94, 20.54. IR(KBr): 3060, 1589, 1471, 752. Anal. Calc.For: C13H11BrS: C, 55.92; H, 3.97. Found: C, 66.59, H, 5.68.

(**4-methoxyphenyl)(p-tolyl)sulfane** (**3l**) [3]: clear oil. 1H NMR: CDCl3 500MHz δ(ppm): 7.39 (dt, *J* = 8.85 e 2.13 Hz, 2H), 7.12 (dt, *J* = 8.24 e 1.83 Hz, 2H), 7.06 (dt, *J* = 8.24 e 0.61 Hz, 2H), 6.86 (dt, *J* = 8.85 e 1.98 Hz, 2H), 3.79 (s, 3H), 2.29 (s, 3H). 13CNMR (125 MHz, CDCl3): 159.46, 136.11, 134.29, 129.74, 129.43, 125.74, 114.87, 55.33, 20.94. IR(KBr): 3011, 1591, 1493, 1247, 807. Anal. Calc.For: C14H14OS: C, 73.01; H, 6.13. Found: C, 73.68; H, 6.15.

**(4) 1H and 13C NMR ESPECTRA**

REFERENCES

1. [] Bates CG, Gujadhur RK, Venkataraman DA, General method for the Formation of aryl-sulfur bonds using copper(I) catalysts. Org. Lett. 2002;4:2803-2806.

   [2] Swapna K, Murthy SN, Jyothi MT, Nageswar YVD, Nano-CuFe2O4 as a magnetically separable and reusable catalyst for the synthesis of diaryl/aryl alkyl sulphides *via* cross-coupling process under ligand-free conditions. Org. Biomol. Chem. 2011;9:5989–5996.

   [3] Wong Y, Jayanth TT, ChengC, A cobalt-catalyzed coupling of aryl halides with thiophenols and alkanethiols allows the preparation of various aryl sulfides in excellent yields under mild reaction conditions. Org. Lett.2006;8:5613–5616.

   [4] Kao H, Chen C, Wang Y, Lee C, An Efficient copper‐catalyzed cross‐coupling reaction of thiols with aryl iodides. Eur. J. Org. Chem. 2011;1776–1781.

   [5] O’Mahony GE, Ford A, Maguire AR, Copper-catalyzed asymmetric oxidation of sulfides. J. Org. Chem. 2012;77:3288−3296.

   [6] Wang H, Jiang L, Chen T, Li Y, A Highly efficient, ligand-free, and recyclable Cu2S-catalyzed coupling of aryl iodides with diaryl disulfides. Eur. J. Org. Chem. 2010; 2324–2329.

   [7]Tan C, Chen GS, Chen C, Chern J, Microwave-assisted cross-coupling for the construction of diaryl sulfides.Journal of the Chinese Chemical Society. 2011;58:94-100.

   [8] Allred GD, Liebeskind LS, Copper-Mediated Cross-Coupling of Organostannanes with Organic Iodides at or below Room Temperature. J. Am. Chem. Soc.1996;118; 2748-2749.

   **[9] Li Y, Nie C, Wang H, Li X, Verpoort F, Duan C. A Highly efficient method for the copper-catalyzed selective synthesis of diaryl chalcogenides from easily available chalcogen sources. Eur. J. Org. Chem. 2011;7331–7338.**

   **[10]Armarego WLF, Chai C. Purification of Laboratory Chemicals, 6th ed.; Butterworth-Heinemann: Burlington; 2009.** [↑](#endnote-ref-1)
